# Supplementary material for: Omnipose: a high-precision morphology-independent solution for bacterial cell segmentation
Source: Springer Nature journal article supplement (doi:10.1038/s41592-022-01639-4), 2022-10-17
Supplement: 41592_2022_1639_MOESM1_ESM.pdf [file 41592_2022_1639_MOESM1_ESM.pdf]

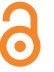

---

# Omnipose: a high-precision morphology-independent solution for bacterial cell segmentation

---

In the format provided by the authors and unedited

---

## Supplementary Table References

- 1 Meberg, B. M., Sailer, F. C., Nelson, D. E. & Young, K. D. Reconstruction of *Escherichia coli* mrcA (PBP 1a) mutants lacking multiple combinations of penicillin binding proteins. *J Bacteriol* **183**, 6148–6149, doi:10.1128/JB.183.20.6148-6149.2001 (2001).
- 2 Barbe, V. *et al.* Unique features revealed by the genome sequence of *Acinetobacter* sp. ADP1, a versatile and naturally transformation competent bacterium. *Nucleic Acids Res* **32**, 5766–5779, doi:10.1093/nar/gkh910 (2004).
- 3 Yu, Y. *et al.* Genomic patterns of pathogen evolution revealed by comparison of *Burkholderia pseudomallei*, the causative agent of melioidosis, to avirulent *Burkholderia thailandensis*. *BMC microbiology* **6**, 46 (2006).
- 4 Lowenthal, A. C. *et al.* Functional analysis of the *Helicobacter pylori* flagellar switch proteins. *J Bacteriol* **191**, 7147–7156, doi:10.1128/JB.00749-09 (2009).
- 5 Evinger, M. & Agabian, N. Envelope-associated nucleoid from *Caulobacter crescentus* stalked and swarmer cells. *J Bacteriol* **132**, 294–301, doi:10.1128/jb.132.1.294-301.1977 (1977).
- 6 Allue-Guardia, A., Echazarreta, M., Koenig, S. S. K., Klose, K. E. & Eppinger, M. Closed Genome Sequence of *Vibrio cholerae* O1 El Tor Inaba Strain A1552. *Genome Announc* **6**, doi:10.1128/genomeA.00098-18 (2018).
- 7 Stover, C. K. *et al.* Complete genome sequence of *Pseudomonas aeruginosa* PA01, an opportunistic pathogen. *Nature* **406**, 959–964 (2000).
- 8 Stringer, C., Wang, T., Michaelos, M. & Pachitariu, M. Cellpose: a generalist algorithm for cellular segmentation. *Nature methods* **18**, 100–106, doi:10.1038/s41592-020-01018-x (2021).
- 9 Wolny, A. *et al.* Accurate and versatile 3D segmentation of plant tissues at cellular resolution. *Elife* **9**, doi:10.7554/eLife.57613 (2020).
